# Supplementary material for: Systematic verification of bladder cancer-associated tissue protein biomarker candidates in clinical urine specimens
Source: PubMed Central journal article supplement (PMC6089400; doi:10.18632/oncotarget.24578), 2018-07-20
Supplement: oncotarget-09-30731-s001.pdf [file oncotarget-09-30731-s001.pdf]

## Systematic verification of bladder cancer-associated tissue protein biomarker candidates in clinical urine specimens

### SUPPLEMENTARY MATERIALS

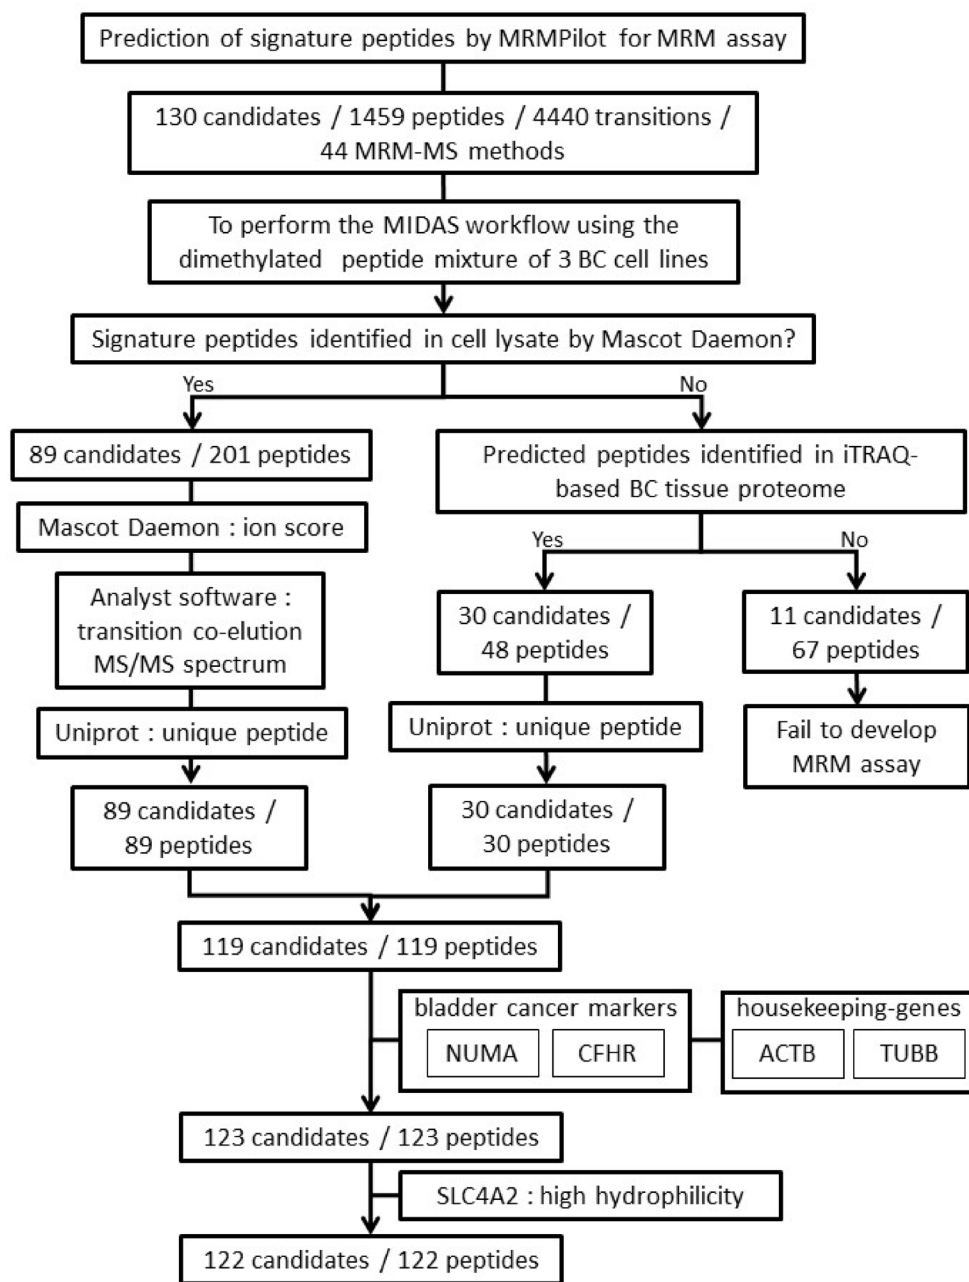

**Supplementary Figure 1: Criteria for signature peptide selection in MRM prescreens of 122 BC tissue candidates.** Signature peptide candidates were predicted by MRMPilot software and screened against BC cell lysate proteins using MIDAS workflow.

### A Mascot Daemon

#### MS / MS spectrum

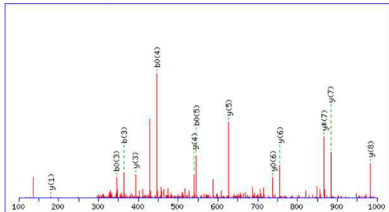

Monoisotopic mass of neutral peptide  $M_r(\text{calc})$ : 1446.8606  
 Variable modifications:  
 N-term: Dimethyl(2H(4)13C(2)) (N-term)  
 K12: Dimethyl(2H(4)13C(2)) (K)  
 Ions Score: 42 Expect: 0.0027  
 Matches (bold Red): 13/14 fragment ions using 31 most intense peaks

#### Detected product ions

| #  | b               | b <sup>++</sup> | b <sup>+</sup> | b <sup>+++</sup> | b <sup>0</sup>  | b <sup>0++</sup> | Seq. | y               | y <sup>++</sup> | y <sup>+</sup>  | y <sup>+++</sup> | y <sup>0</sup>  | y <sup>0++</sup> | #  |
|----|-----------------|-----------------|----------------|------------------|-----------------|------------------|------|-----------------|-----------------|-----------------|------------------|-----------------|------------------|----|
| 1  | 164.1130        | 82.5601         |                |                  | 146.1024        | 73.5548          | E    |                 |                 |                 |                  |                 |                  | 12 |
| 2  | 277.1970        | 139.1022        |                |                  | 259.1865        | 130.0969         | L    | 1284.7622       | 642.8847        | 1267.7356       | 634.3715         | 1266.7516       | 633.8795         | 11 |
| 3  | <b>364.2291</b> | 182.6182        |                |                  | <b>346.2185</b> | 173.6129         | S    | 1171.6781       | 586.3427        | 1154.6516       | 577.8294         | 1153.6676       | 577.3374         | 10 |
| 4  | 465.2767        | 233.1420        |                |                  | <b>447.2662</b> | 224.1367         | T    | 1084.6461       | 542.8267        | 1067.6195       | 534.3134         | 1066.6355       | 533.8214         | 9  |
| 5  | 564.3452        | 282.6762        |                |                  | <b>546.3346</b> | 273.6709         | V    | <b>983.5984</b> | 492.3028        | 966.5719        | 483.7896         | 965.5879        | 483.2976         | 8  |
| 6  | 692.4037        | 346.7055        | 675.3772       | 338.1922         | 674.3932        | 337.7002         | Q    | <b>884.5300</b> | 442.7686        | <b>867.5035</b> | 434.2554         | 866.5194        | 433.7634         | 7  |
| 7  | 821.4463        | 411.2268        | 804.4198       | 402.7135         | 803.4358        | 402.2215         | E    | <b>756.4714</b> | 378.7394        | 739.4449        | 370.2261         | <b>738.4609</b> | 369.7341         | 6  |
| 8  | 908.4784        | 454.7428        | 891.4518       | 446.2295         | 890.4678        | 445.7375         | S    | <b>627.4288</b> | 314.2181        | 610.4023        | 305.7048         | 609.4183        | 305.2128         | 5  |
| 9  | 1055.5468       | 528.2770        | 1038.5202      | 519.7638         | 1037.5362       | 519.2717         | F    | <b>540.3968</b> | 270.7020        | 523.3703        | 262.1888         |                 |                  | 4  |
| 10 | 1168.6308       | 584.8191        | 1151.6043      | 576.3058         | 1150.6203       | 575.8138         | L    | <b>393.3284</b> | 197.1678        | 376.3018        | 188.6546         |                 |                  | 3  |
| 11 | 1267.6993       | 634.3533        | 1250.6727      | 625.8400         | 1249.6887       | 625.3480         | V    | 280.2443        | 140.6258        | 263.2178        | 132.1125         |                 |                  | 2  |
| 12 |                 |                 |                |                  |                 |                  | K    | <b>181.1759</b> | 91.0916         | 164.1494        | 82.5783          |                 |                  | 1  |

### B Analyst software

Protein name : Alpha-2-macroglobulin-like protein 1  
 Q1 (m/z) : 724.44 (charge : 2<sup>+</sup>)  
 Gene name : A2ML1  
 Modification : Heavy dimethylation (+72 Da)  
 Peptide sequence : [<sup>13</sup>C<sub>2</sub>D<sub>4</sub>H<sub>2</sub>]-ELSTVQESFLVK[<sup>13</sup>C<sub>2</sub>D<sub>4</sub>H<sub>2</sub>]

#### Q3 transition signal

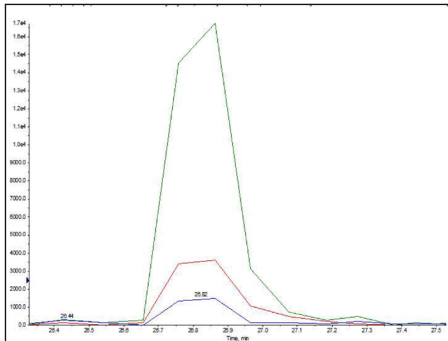

#### MS / MS spectrum

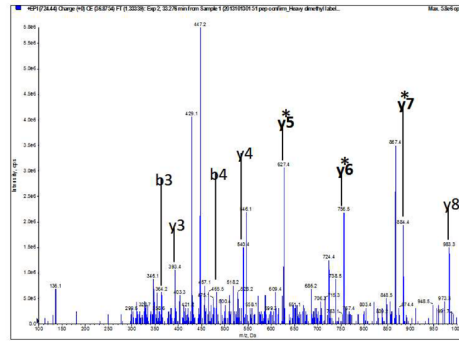

\*: Q3 transition was selected for MRM assay development.

**Supplementary Figure 2: An example of MS/MS spectrum confirmation by Mascot Daemon and Analyst software.** (A) The ion score of the MS/MS spectrum in Mascot Daemon, and (B) co-elution of product ions in Analyst software, were further confirmed from the raw data of MRM Q3 signal and MS/MS spectrum. The intensity distributions of the top three product ions were further confirmed by MRM-MS.

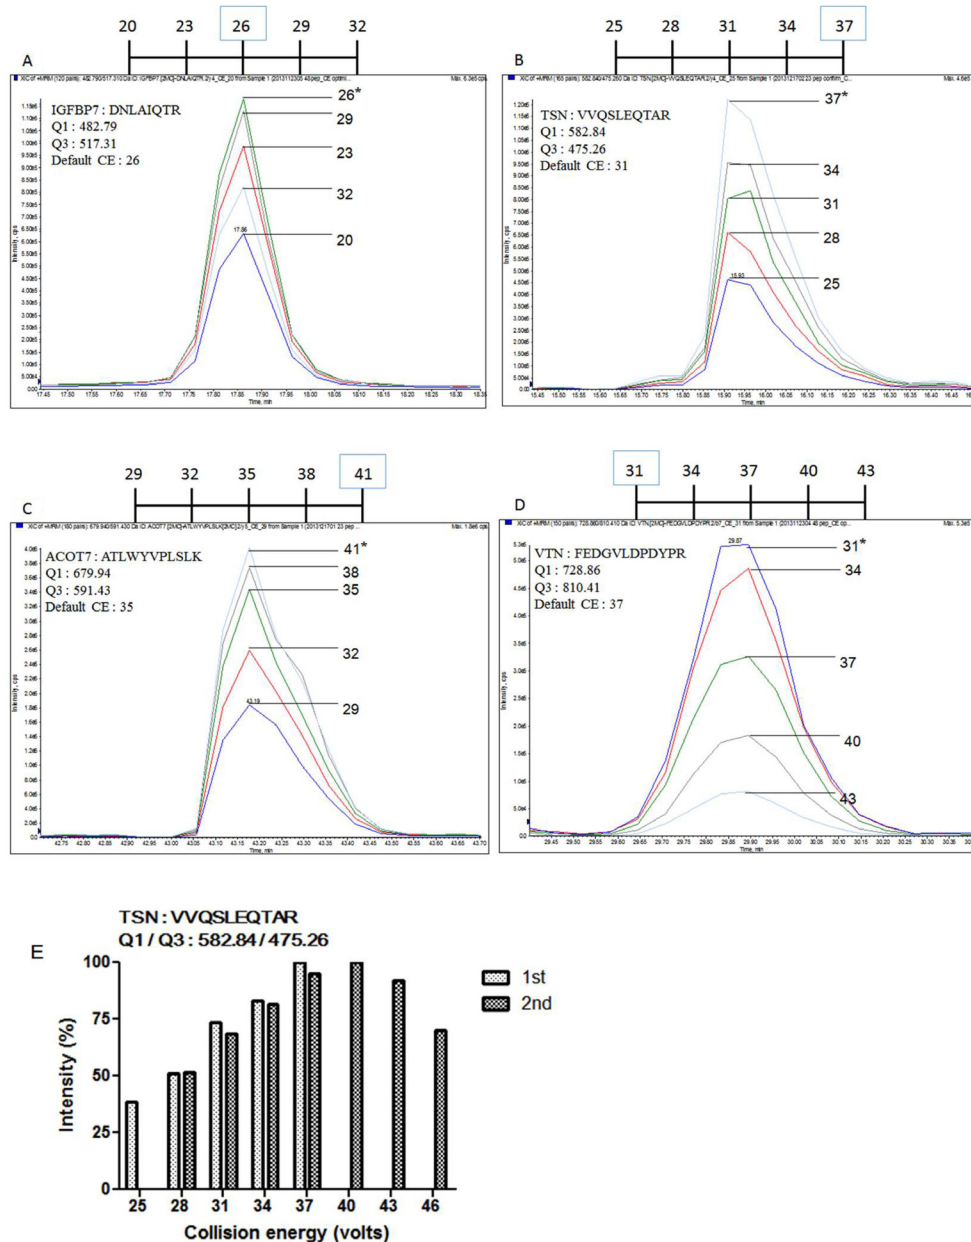

**Supplementary Figure 3: Selecting the best CE using the CE ramping mode in a QTRAP MS.** The Q3 signal of (A) IGFBP7, (B) TSN, (C) ACOT7 and (D) VTN were triggered with different CEs, expressed as volts. Asterisks and blue squares, optimized CE values that generate the highest Q3 ion intensity. (E) The signal intensity of TSN (Q1/Q3: 582.84/475.26) at different CE values. Comparison of Q3 ion intensities generated using different CE values. The ramping process was performed twice using difference CE ranges to optimize CE value for the TSN peptide.

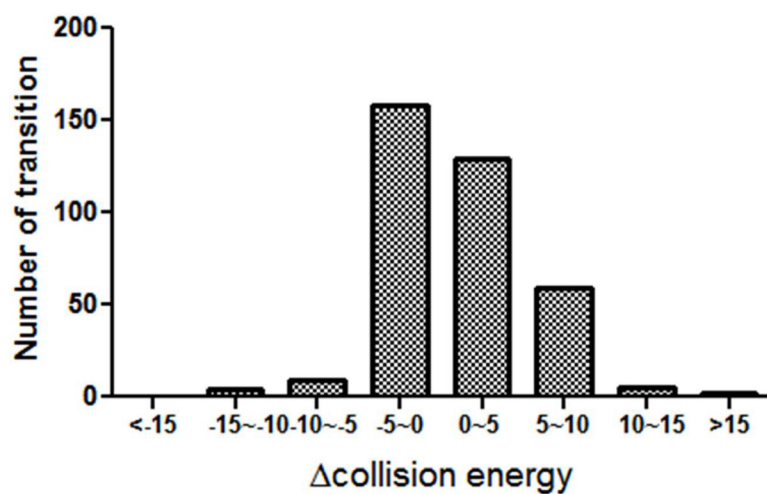

**Supplementary Figure 4:** Comparison of differences in CE between default and optimized value ( $\Delta$ CE) for all optimized Q1/Q3 transitions. The average  $\Delta$ CE was  $2.09 \pm 4.62$  V.

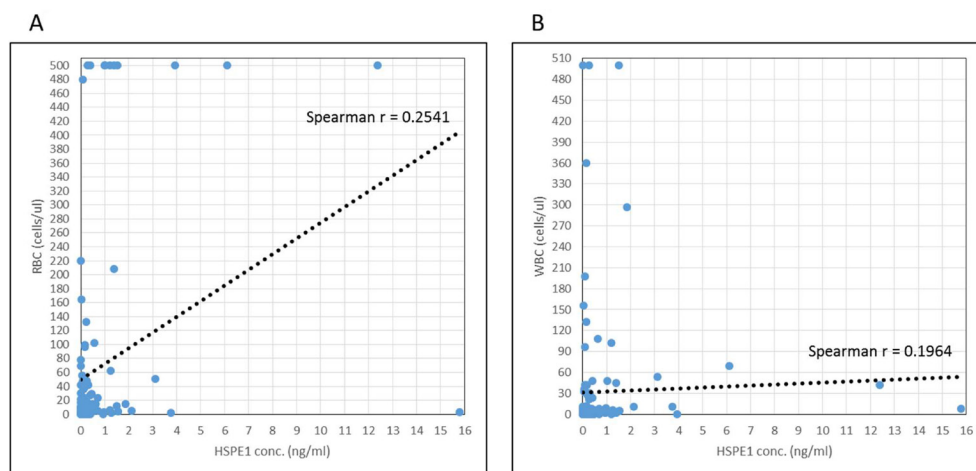

**Supplementary Figure 5:** Correlation analysis between urinary HSPE1 levels with urine (A) RBC and (B) WBC numbers in BC patients ( $n = 119$ ).

**Supplementary Table 1: The list of 130 protein biomarker candidates for MRM assay development and their secretory properties.** See Supplementary\_Table\_1

**Supplementary Table 2: Criteria of peptide selection for MRM assay development.** See Supplementary\_Table\_2

**Supplementary Table 3: The transition list of MRM assay of 122 bladder cancer associated tissue proteins.** See Supplementary\_Table\_3

**Supplementary Table 4: The CV values for quantifying 122 bladder cancer associated tissue proteins in clinical urine specimens.** See Supplementary\_Table\_4

**Supplementary Table 5: Quantitative results of 12 detectable bladder cancer associated tissue proteins by MRM assay in clinical urine specimens**

| Targets  |                 | Bladder cancer ( <i>n</i> = 30) |                                              |                                                |
|----------|-----------------|---------------------------------|----------------------------------------------|------------------------------------------------|
|          |                 | Hernia<br>( <i>n</i> = 31)      | <i>v.s.</i><br>Hematuria<br>( <i>n</i> = 30) | Urinary tract<br>infection<br>( <i>n</i> = 28) |
| ACTB     | Fold change     | 1.017                           | 0.867                                        | 0.355                                          |
|          | <i>p</i> -value | 0.983                           | 0.409                                        | 0.007                                          |
| GAA      | Fold change     | 0.426                           | 0.807                                        | 1.520                                          |
|          | <i>p</i> -value | 0.142                           | 0.215                                        | 0.391                                          |
| HSP90AB1 | Fold change     | 2.523                           | 1.124                                        | 0.763                                          |
|          | <i>p</i> -value | 0.159                           | 0.981                                        | 0.225                                          |
| LAMP2    | Fold change     | 0.445                           | 0.402                                        | 0.969                                          |
|          | <i>p</i> -value | 0.058                           | 0.004                                        | 0.832                                          |
| RAB11B   | Fold change     | 1.124                           | 1.346                                        | 0.511                                          |
|          | <i>p</i> -value | 0.918                           | 0.383                                        | 0.489                                          |
| TPI1     | Fold change     | 1.339                           | 1.960                                        | 0.846                                          |
|          | <i>p</i> -value | 0.873                           | 0.401                                        | 0.987                                          |
| VTN      | Fold change     | 0.410                           | 0.751                                        | 0.783                                          |
|          | <i>p</i> -value | 0.182                           | 0.588                                        | 0.260                                          |
| DPP7     | Fold change     | 0.595                           | 0.835                                        | 1.172                                          |
|          | <i>p</i> -value | 0.042                           | 0.836                                        | 0.699                                          |
| ENO1     | Fold change     | Cancer only                     | 0.918                                        | 0.254                                          |
|          | <i>p</i> -value | N/A                             | 0.352                                        | 0.065                                          |
| IGFBP7   | Fold change     | 0.621                           | 1.694                                        | 3.507                                          |
|          | <i>p</i> -value | 0.894                           | 0.548                                        | 0.035                                          |
| RNASET2  | Fold change     | 0.474                           | 0.406                                        | 0.274                                          |
|          | <i>p</i> -value | 0.001                           | <0.0001                                      | <0.0001                                        |
| SERPINA3 | Fold change     | 1.013                           | 0.689                                        | 0.556                                          |
|          | <i>p</i> -value | 0.493                           | 0.039                                        | 0.234                                          |

**Supplementary Table 6: Correlation results between urinary HSPE1 expression and clinicopathological characteristics of the bladder cancer patients by a Chi-squared test**

| Characteristics                | Urinary HSPE1 Conc. (ng/ml) |              | Total number | <i>p</i> values |
|--------------------------------|-----------------------------|--------------|--------------|-----------------|
|                                | Low                         | High         |              |                 |
|                                | <0.074 g/mL                 | >0.074 ng/mL |              |                 |
| <b>Age</b>                     |                             |              |              |                 |
| ≤65 years                      | 16                          | 47           | 63           | 0.960           |
| >65 years                      | 15                          | 45           | 60           |                 |
| <b>Sex</b>                     |                             |              |              |                 |
| Male                           | 25                          | 67           | 92           | 0.270           |
| Female                         | 6                           | 28           | 34           |                 |
| <b>Histologic grade</b>        |                             |              |              |                 |
| Low grade                      | 10                          | 32           | 42           | 0.884           |
| High grade                     | 21                          | 63           | 84           |                 |
| <b>TNM stage</b>               |                             |              |              |                 |
| Early stage                    | 23                          | 75           | 98           | 0.580           |
| Advanced stage                 | 8                           | 20           | 28           |                 |
| <b>Hematuria</b>               |                             |              |              |                 |
| RBC<20 (cells/ul)              | 23                          | 58           | 81           | 0.395           |
| RBC>20 (cells/ul)              | 8                           | 30           | 38           |                 |
| <b>Urinary tract infection</b> |                             |              |              |                 |
| WBC<30 (cells/ul)              | 28                          | 68           | 96           | 0.114           |
| WBC>30 (cells/ul)              | 3                           | 20           | 23           |                 |

**Supplementary Table 7: The IHC scores of expressions of HSPE1 in clinical tissue slides of BC patients.** See Supplementary\_Table\_7

## REFERENCES

1. Chen CL, Lai YF, Tang P, Chien KY, Yu JS, Tsai CH, Chen HW, Wu CC, Chung T, Hsu CW, Chen CD, Chang YS, Chang PL, et al. Comparative and targeted proteomic analyses of urinary microparticles from bladder cancer and hernia patients. *J Proteome Res.* 2012; 11:5611–29.
2. Wu CC, Hsu CW, Chen CD, Yu CJ, Chang KP, Tai DI, Liu HP, Su WH, Chang YS, Yu JS. Candidate serological biomarkers for cancer identified from the secretomes of 23 cancer cell lines and the human protein atlas. *Mol Cell Proteomics.* 2010; 9:1100–17.
